# Supplementary material for: Fate of pyrene on mineral surfaces during thermal remediation as a function of temperature
Source: Royal Society of Chemistry journal article supplement (doi:10.1039/d2em00027j), 2022-01-01
Supplement: d2em00027j1.pdf [file d2em00027j1.pdf]

Electronic Supplementary Information (ESI)

**Fate of Pyrene on Mineral Surfaces during Thermal Remediation as a Function of  
Temperature**

Cameron P. Oden<sup>a</sup>, Charles J. Werth<sup>b</sup>, Luiza Notini<sup>b</sup>, Lynn E. Katz<sup>b</sup>

<sup>a</sup>Department of Civil, Environmental, and Architectural Engineering, University of  
Colorado Boulder, Boulder, Colorado

<sup>b</sup>Department of Civil, Architectural, and Environmental Engineering, University of Texas  
at Austin, Austin, Texas

<sup>c</sup>Department of Environmental Systems Science, ETH Zurich, Zurich, Switzerland

\*Corresponding Author:

Cameron Oden

503-409-8854

cameron.oden@colorado.edu

Environmental Science: Processes and Impacts

## Contents

|                                                                                                                                                                                                                                                                                                                                                                                                                                                                                                                                                                                                                                                               |    |
|---------------------------------------------------------------------------------------------------------------------------------------------------------------------------------------------------------------------------------------------------------------------------------------------------------------------------------------------------------------------------------------------------------------------------------------------------------------------------------------------------------------------------------------------------------------------------------------------------------------------------------------------------------------|----|
| <b>1. GC/MS Methods</b> .....                                                                                                                                                                                                                                                                                                                                                                                                                                                                                                                                                                                                                                 | 3  |
| <b>Table S2:</b> Lowest significant difference (LSD) calculated from ANOVA of treatment temperature and percent removal of pyrene in parent removal experiments. Differences in removal greater than LSD are highlighted in green.....                                                                                                                                                                                                                                                                                                                                                                                                                        | 4  |
| <b>2. Parent Removal Experiments</b> .....                                                                                                                                                                                                                                                                                                                                                                                                                                                                                                                                                                                                                    | 4  |
| <b>Table S1:</b> p-value from ANOVA of treatment temperature and percent removal of pyrene in parent removal experiments. p-values < 0.05 are highlighted in green.....                                                                                                                                                                                                                                                                                                                                                                                                                                                                                       | 4  |
| <b>3. Mineral-Limited Experiments</b> .....                                                                                                                                                                                                                                                                                                                                                                                                                                                                                                                                                                                                                   | 5  |
| <b>Figure S1:</b> Standard curves derived from MassHunter qualitative analysis.....                                                                                                                                                                                                                                                                                                                                                                                                                                                                                                                                                                           | 5  |
| <b>Table S3:</b> Detected by-products from dry, mineral-limited experiments with magnetite listed by temperature with match score, molecular weight, and peak area. Estimated masses are included for compounds included in calibration curve (Figure S1).....                                                                                                                                                                                                                                                                                                                                                                                                | 5  |
| <b>Table S4:</b> Detected by-products from saturated, mineral-limited experiments with magnetite listed by temperature with match score, molecular weight, and peak area. Estimated masses are included for compounds included in calibration curve (Figure S1). ...                                                                                                                                                                                                                                                                                                                                                                                          | 6  |
| <b>4. Mineral Analysis</b> .....                                                                                                                                                                                                                                                                                                                                                                                                                                                                                                                                                                                                                              | 7  |
| <b>Table S5:</b> Specific surface area of selected minerals determined by N <sub>2</sub> -BET.....                                                                                                                                                                                                                                                                                                                                                                                                                                                                                                                                                            | 7  |
| <b>4.1. XRD Patterns</b> .....                                                                                                                                                                                                                                                                                                                                                                                                                                                                                                                                                                                                                                | 7  |
| <b>Figure S2.</b> XRD patterns showing no bulk transformation of hematite under selected conditions: a) raw hematite, b) hematite treated at 150 °C for 30 min in air with 0.050 g pyrene and 50 uL of H <sub>2</sub> O, c) hematite treated at 150 °C for 30 min in N <sub>2</sub> with 0.050 g pyrene, d) hematite treated at 150 °C for 30 min in N <sub>2</sub> without pyrene, e) hematite treated at 250 °C for 30 min in air with 0.050 g pyrene and 50 uL of H <sub>2</sub> O, f) hematite treated at 250 °C for 30 min in N <sub>2</sub> with 0.050 g pyrene, g) hematite treated at 250 °C for 30 min in N <sub>2</sub> without pyrene .....        | 7  |
| <b>Figure S3.</b> XRD patterns showing no bulk transformation of magnetite under various conditions: a) raw magnetite, b) magnetite treated at 150 °C for 30 min in air with 0.050 g pyrene and 50 uL of H <sub>2</sub> O, c) magnetite treated at 150 °C for 30 min in N <sub>2</sub> with 0.050 g pyrene, d) magnetite treated at 150 °C for 30 min in N <sub>2</sub> without pyrene, e) magnetite treated at 250 °C for 30 min in air with 0.050 g pyrene and 50 uL of H <sub>2</sub> O, f) magnetite treated at 250 °C for 30 min in N <sub>2</sub> with 0.050 g pyrene, g) magnetite treated at 250 °C for 30 min in N <sub>2</sub> without pyrene ..... | 8  |
| <b>Figure S4:</b> XRD patterns of birnessite after treatment under various conditions. Crystal phases detected shown next to diffraction patterns.....                                                                                                                                                                                                                                                                                                                                                                                                                                                                                                        | 9  |
| <b>4.2. XPS Spectra</b> .....                                                                                                                                                                                                                                                                                                                                                                                                                                                                                                                                                                                                                                 | 10 |
| <b>Figure S5.</b> XPS Fe 2p spectra for a) untreated hematite, b) hematite treated at 250 °C for 30 min in N <sub>2</sub> , c) hematite treated at 250 °C for 30 min in air with 100 uL H <sub>2</sub> O, d) hematite treated at 250 °C for 30 min in N <sub>2</sub> with 0.050 g pyrene, e) hematite treated at 250 °C for 30 min in air with 0.050 g pyrene and 100 uL H <sub>2</sub> O,.....                                                                                                                                                                                                                                                               | 10 |

|                                                                                                                                                                                                                                                                                                                                                                                                                                                                                                                                                                                                                                                           |    |
|-----------------------------------------------------------------------------------------------------------------------------------------------------------------------------------------------------------------------------------------------------------------------------------------------------------------------------------------------------------------------------------------------------------------------------------------------------------------------------------------------------------------------------------------------------------------------------------------------------------------------------------------------------------|----|
| <b>Figure S6.</b> XPS Fe 2p spectra for a) untreated magnetite, b) magnetite treated at 250 °C for 30 min in N <sub>2</sub> , c) magnetite treated at 250 °C for 30 min in air with 100 uL H <sub>2</sub> O, d) magnetite treated at 250 °C for 30 min in N <sub>2</sub> with 0.050 g pyrene, e) magnetite treated at 250 °C for 30 min in air with 0.050 g pyrene and 100 uL H <sub>2</sub> O. Satellite peak indicating presence of hematite indicated by arrows .....                                                                                                                                                                                  | 11 |
| <b>Figure S7.</b> XPS Mn 2p spectra for a) untreated birnessite, b) birnessite treated at 250 °C for 30 min in N <sub>2</sub> , c) birnessite treated at 250 °C for 30 min in N <sub>2</sub> with 0.050 g pyrene, d) birnessite treated at 250 °C for 30 min in air with 100 uL H <sub>2</sub> O, d) birnessite treated at 250 °C for 30 min in air with 0.050 g pyrene and 100 uL H <sub>2</sub> O. Presence of shoulder indicated by arrows. Shoulder located on the left side of the peak indicates the presence of MnO <sub>2</sub> . Shoulder located on the right side of the peak indicates the presence of Mn <sub>2</sub> O <sub>3</sub> . ..... | 12 |
| <b>4.3. Electron transfer calculations</b> .....                                                                                                                                                                                                                                                                                                                                                                                                                                                                                                                                                                                                          | 13 |
| <b>Table S6.</b> Fe(III):Fe(II) ratios of magnetite samples treated under various conditions calculated from XPS Fe 2p peaks. ....                                                                                                                                                                                                                                                                                                                                                                                                                                                                                                                        | 13 |
| <b>5. Mössbauer</b> .....                                                                                                                                                                                                                                                                                                                                                                                                                                                                                                                                                                                                                                 | 14 |
| <b>Figure S8.</b> Mössbauer spectra of magnetite blank, magnetite wet and magnetite dry .....                                                                                                                                                                                                                                                                                                                                                                                                                                                                                                                                                             | 14 |
| <b>Table S7.</b> Mössbauer parameters of magnetite samples derived from fitting spectra collected at 140 K. ....                                                                                                                                                                                                                                                                                                                                                                                                                                                                                                                                          | 14 |
| <b>Figure S9.</b> Mössbauer spectra of hematite blank, hematite wet and hematite dry .....                                                                                                                                                                                                                                                                                                                                                                                                                                                                                                                                                                | 15 |
| <b>Table S8.</b> Mössbauer parameters of magnetite samples derived from fitting spectra collected at 140 K. ....                                                                                                                                                                                                                                                                                                                                                                                                                                                                                                                                          | 15 |
| <b>6. By-Product Oxidation States</b> .....                                                                                                                                                                                                                                                                                                                                                                                                                                                                                                                                                                                                               | 16 |
| <b>Table S9:</b> Average oxidation state of carbons atoms in byproducts detected from concentrated extracts in mineral limited experiments with magnetite in a dry environment. ....                                                                                                                                                                                                                                                                                                                                                                                                                                                                      | 16 |
| <b>Table S10:</b> Average oxidation state of carbons atoms in byproducts detected from concentrated extracts in mineral limited experiments with magnetite in a saturated environment. ....                                                                                                                                                                                                                                                                                                                                                                                                                                                               | 17 |

## 1. GC/MS Methods

### *Extracts –*

Injection Volume: 1 uL

Inlet Temperature: 320 °C

Column Flow: 1.2 mL/min

Temperature Program:

|         | Rate (°C/min) | Final Temperature (°C) | Hold Time (min) |
|---------|---------------|------------------------|-----------------|
| Initial |               | 50                     | 0.4             |
| Ramp 1  | 25            | 195                    | 1.5             |
| Ramp 2  | 8             | 255                    | 0               |
| Ramp 3  | 2.5           | 260                    | 0               |
| Ramp 4  | 20            | 295                    | 0               |
| Ramp 5  | 10            | 310                    | 3.5             |

MSD Transfer Line Temperature: 300 °C

MS Source Temperature: 250 °C

MS Quad Temperature: 150 °C

### *Headspace –*

Injection Volume: 200 uL

Inlet Temperature: 250 °C

Column Flow: 0.7 mL/min

Split Ratio: 20:1

Temperature Program:

|         | Rate (°C/min) | Final Temperature (°C) | Hold Time (min) |
|---------|---------------|------------------------|-----------------|
| Initial |               | 35                     | 5               |
| Ramp 1  | 25            | 250                    | 2               |

MSD Transfer Line Temperature: 300 °C

MS Source Temperature: 230 °C

MS Quad Temperature: 150 °C

## 2. Parent Removal Experiments

**Table S1:** p-value from ANOVA of treatment temperature and percent removal of pyrene in parent removal experiments. p-values < 0.05 are highlighted in green.

| p-value | Dry     | Wet    |
|---------|---------|--------|
| Bir     | 3.6E-05 | 0.0010 |
| Mag     | 0.00011 | 0.20   |
| Hem     | 0.0067  | 0.043  |

**Table S2:** Lowest significant difference (LSD) calculated from ANOVA of treatment temperature and percent removal of pyrene in parent removal experiments. Differences in removal greater than LSD are highlighted in green.

| Experiment | LSD | AVG <sub>150</sub> | $\Delta_{150-200}$ | AVG <sub>200</sub> | $\Delta_{200-250}$ | AVG <sub>250</sub> | $\Delta_{150-250}$ |      |
|------------|-----|--------------------|--------------------|--------------------|--------------------|--------------------|--------------------|------|
| Dry        | Bir | 8.1                | 46.8               | 25.2               | 72.0               | 28.0               | 100.0              | 53.2 |
|            | Mag | 5.2                | 46.7               | 16.9               | 63.6               | 11.0               | 74.6               | 27.8 |
|            | Hem | 17.7               | 19.2               | 14.2               | 33.4               | 36.9               | 70.3               | 51.1 |
|            | LSD | AVG <sub>75</sub>  | $\Delta_{75-100}$  | AVG <sub>100</sub> | $\Delta_{100-150}$ | AVG <sub>150</sub> | $\Delta_{75-150}$  |      |
| Wet        | Bir | 8.8                | 60.1               | 19.5               | 79.5               | 12.1               | 91.6               | 31.6 |
|            | Mag | 19.9               | 60.4               | 18.1               | 78.5               | -1.1               | 77.4               | 17.0 |
|            | Hem | 12.1               | 65.5               | 10.5               | 75.9               | 9.5                | 85.5               | 20.0 |

### 3. Mineral-Limited Experiments

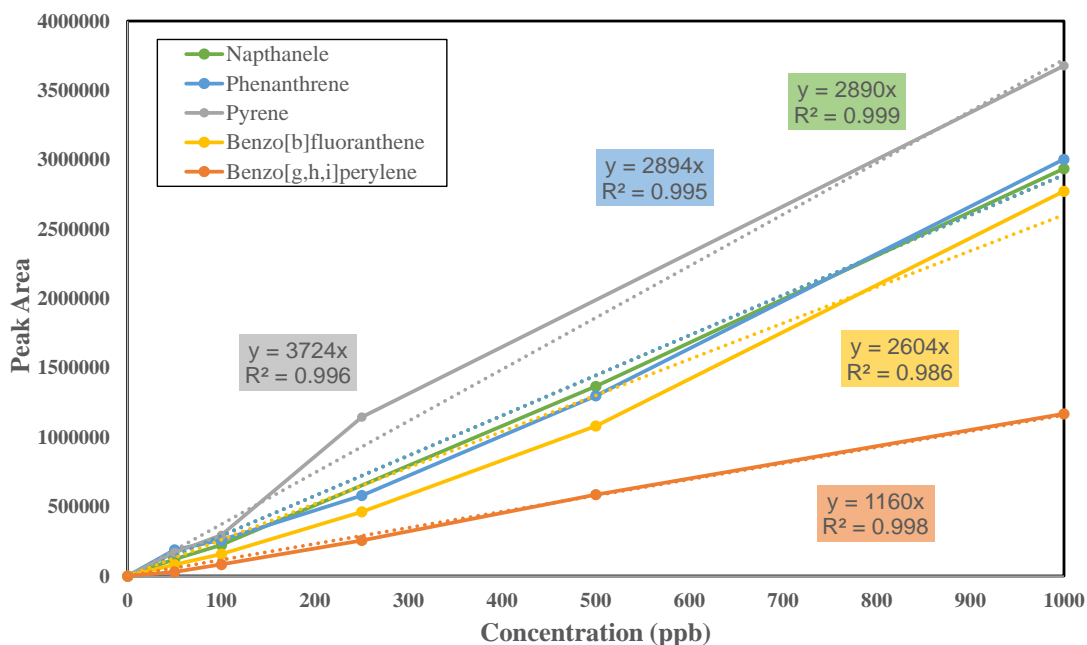

**Figure S1:** Standard curves derived from MassHunter qualitative analysis.

**Table S3:** Detected by-products from dry, mineral-limited experiments with magnetite listed by temperature with match score, molecular weight, and peak area. Estimated masses are included for compounds included in calibration curve (Figure S1).

| Temperature            | Compound                              | Score | MW     | Peak Area | Mass ( $\mu\text{g}$ ) |
|------------------------|---------------------------------------|-------|--------|-----------|------------------------|
| 500 °C                 | 4,5-diethyl-octane                    | 97    | 170.2  | 26277377  |                        |
|                        | 5,6-dimethyl-decane                   | 96    | 170.2  | 21254399  |                        |
|                        | 5-methyl-undecane                     | 91    | 170.2  | 4170193   |                        |
|                        | 3-ethyl-5-methyl-1-propyl-cyclohexane | 89    | 168.2  | 7704961   |                        |
|                        | (1,2-dimethylbutyl)-cyclohexane       | 92    | 168.2  | 16568368  |                        |
|                        | Undecyl-cyclohexane                   | 81    | 238.3  | 8400050   |                        |
|                        | Octyl-cyclohexane                     | 91    | 196.2  | 13062669  |                        |
|                        | Naphthalene                           | 96    | 128.1  | 38510240  | 40                     |
|                        | Phenanthrene                          | 98    | 178.1  | 2645088   | 2.7                    |
|                        | Benzo[a]fluorene                      | 87    | 216.1  | 262814    |                        |
|                        | 1-methyl-pyrene                       | 93    | 216.1  | 1478264   |                        |
|                        | Perylene                              | 82    | 252.1  | 107528    |                        |
|                        | 1-phenyl-pyrene                       | 97    | 278.1  | 5311060   |                        |
|                        | Benzo[ghi]perylene                    | 91    | 276.1  | 181424    | 0.21                   |
| Indeno[1,2,3-cd]pyrene | 84                                    | 276.1 | 102196 |           |                        |
| 300 °C                 | 9-ethenyl-anthracene                  | 96    | 204.1  | 6861137   |                        |
|                        | Fluoranthene                          | 94    | 202.1  | 12437093  | 10                     |
| 200 °C                 | 2,2',5,5'-tetramethyl-1,1'-Biphenyl   | 82    | 210    | 76709     |                        |
|                        | Cyclopenta[def]phenanthrene           | 94    | 190    | 1286791   |                        |
|                        | 1-phenyl-naphthalene                  | 85    | 204    | 9648460   |                        |
|                        | Benzo[a]fluorene                      | 90    | 216    | 614798    |                        |
|                        | Benzo[c]fluorene                      | 87    | 216    | 230230    |                        |
| 100 °C                 | Cyclopenta[def]phenanthrene           | 95    | 190.1  | 1259038   |                        |
|                        | 4,5-dihydro-acephenanthrylene         | 91    | 204.1  | 10143710  |                        |
|                        | Benzo[c]fluorene                      | 86    | 216.1  | 55594     |                        |
|                        | Benzo[b]fluorene                      | 94    | 216.1  | 534719    |                        |
|                        | Benzo[a]fluorene                      | 83    | 216.1  | 196969    |                        |

**Table S4:** Detected by-products from saturated, mineral-limited experiments with magnetite listed by temperature with match score, molecular weight, and peak area. Estimated masses are included for compounds included in calibration curve (Figure S1).

| <i>Temperature</i>            | <i>Compound</i>                       | <i>Score</i> | <i>MW</i>     | <i>Peak Area</i> | <i>Mass (µg)</i> |
|-------------------------------|---------------------------------------|--------------|---------------|------------------|------------------|
| <b>500 °C</b>                 | 3-n-Propyl-5-methylhexan-2-one        | 92           | 156.2         | 6431370          |                  |
|                               | 4,5-diethyl-octane                    | 97           | 170.2         | 27918984         |                  |
|                               | 5,6-dimethyl-decane                   | 95           | 170.2         | 22753803         |                  |
|                               | 5-methyl-undecane                     | 91           | 170.2         | 4489649          |                  |
|                               | 3-ethyl-5-methyl-1-propyl-cyclohexane | 89           | 168.2         | 8005084          |                  |
|                               | (1,2-dimethylbutyl)-cyclohexane       | 92           | 168.2         | 16709801         |                  |
|                               | Octyl-cyclohexane                     | 90           | 196.2         | 13264257         |                  |
|                               | Cyclohexaneethanol                    | 83           | 128.1         | 3569167          |                  |
|                               | 3-Hexanone                            | 84           | 100.1         | 23292995         |                  |
|                               | Biphenyl                              | 82           | 154.1         | 98833            |                  |
|                               | 5,8-Tridecadiene                      | 82           | 212.2         | 968078           |                  |
|                               | Naphtho[2,1-b]furan                   | 81           | 168.1         | 43112            |                  |
|                               | Dibenzofuran                          | 89           | 168.1         | 146441           |                  |
|                               | Benzophenone                          | 95           | 182.1         | 224426           |                  |
|                               | <b>Phenanthrene</b>                   | <b>99</b>    | <b>178.1</b>  | <b>7489250</b>   | <b>7.8</b>       |
|                               | 1-(phenylmethylene)-indene            | 95           | 204.1         | 162821           |                  |
|                               | Phenalen-1-one                        | 90           | 180.1         | 8025703          |                  |
|                               | Cyclopenta(def)phenanthrenone         | 82           | 204.1         | 3417633          |                  |
|                               | Benzanthrene                          | 91           | 216.1         | 409789           |                  |
|                               | Benzo[a]fluorene                      | 94           | 216.1         | 3172901          |                  |
|                               | 1-methyl-pyrene                       | 95           | 216.1         | 10474807         |                  |
|                               | 3,4-dihydro-cyclopenta(cd)pyrene      | 89           | 228.1         | 284082           |                  |
|                               | Naphtho[2,1,8,7-klmn]xanthene         | 82           | 242.1         | 469916           |                  |
|                               | 5-Methoxy-benzo[c]phenanthrene        | 82           | 258.1         | 5580678          |                  |
|                               | 1-hydroxypyrene                       | 87           | 218.1         | 3464928          |                  |
|                               | <b>Benzo[e]pyrene</b>                 | <b>95</b>    | <b>252.1</b>  | <b>901841</b>    | <b>1.0</b>       |
| 1-phenyl-pyrene               | 97                                    | 278.1        | 30292897      |                  |                  |
| Pentacene                     | 90                                    | 278.1        | 1181447       |                  |                  |
| <b>Indeno[1,2,3-cd]pyrene</b> | <b>94</b>                             | <b>276.1</b> | <b>355826</b> | <b>0.92</b>      |                  |
| <b>300 °C</b>                 | 4,4-dimethyl-undecane                 | 80           | 184.2         | 67776            |                  |
|                               | 4,5-diethyl-octane                    | 85           | 170.2         | 233128           |                  |
|                               | 3,4,5-trimethyl-heptane               | 91           | 142.2         | 139071           |                  |
|                               | (1,2-dimethylbutyl)-cyclohexane       | 91           | 168.2         | 285668           |                  |
|                               | (1-methylethyl)-cyclohexane           | 85           | 126.1         | 185384           |                  |
|                               | 3-n-Propyl-2,4-pentanedione           | 81           | 142.1         | 54900            |                  |
|                               | Cyclopenta[def]phenanthrene           | 97           | 190.1         | 1453981          |                  |
|                               | 9-ethenyl-anthracene                  | 90           | 204.1         | 10600039         |                  |
|                               | Benzo[c]fluorene                      | 93           | 216.1         | 659899           |                  |
|                               | Benzo[a]fluorene                      | 95           | 216.1         | 659912           |                  |
|                               | 1,3-dimethyl-pyrene                   | 80           | 230.1         | 1403443          |                  |
|                               | Isobutyl Stearate                     | 92           | 340.3         | 9304170          |                  |
|                               | 1-Hydroxypyrene                       | 84           | 218.1         | 194074           |                  |
| <b>200 °C</b>                 | Cyclopenta[def]phenanthrene           | 96           | 190.1         | 778656           |                  |
|                               | 4,5-dihydro-acephenanthrylene         | 94           | 204.1         | 6637244          |                  |
|                               | Benzo[a]fluorene                      | 92           | 216.1         | 366328           |                  |
|                               | Benzo[c]fluorene                      | 90           | 216.1         | 136785           |                  |
| <b>100 °C</b>                 | Cyclopenta[def]phenanthrene           | 96           | 190.1         | 872696           |                  |
|                               | 9-ethenyl-anthracene                  | 90           | 204.1         | 7531669          |                  |
|                               | Benzo[a]fluorene                      | 92           | 216.1         | 425216           |                  |
|                               | Benzanthrene                          | 86           | 216.1         | 223624           |                  |

## 4. Mineral Analysis

**Table S5:** Specific surface area of selected minerals determined by N<sub>2</sub>-BET.

| Mineral    | Formula                        | Specific Surface Area (m <sup>2</sup> /g) |
|------------|--------------------------------|-------------------------------------------|
| Birnessite | δ-MnO <sub>2</sub>             | 118                                       |
| Magnetite  | Fe <sub>3</sub> O <sub>4</sub> | 5.7                                       |
| Hematite   | Fe <sub>2</sub> O <sub>3</sub> | 7.4                                       |
| Quartz     | SiO <sub>2</sub>               | 3.7                                       |

### 4.1. XRD Patterns

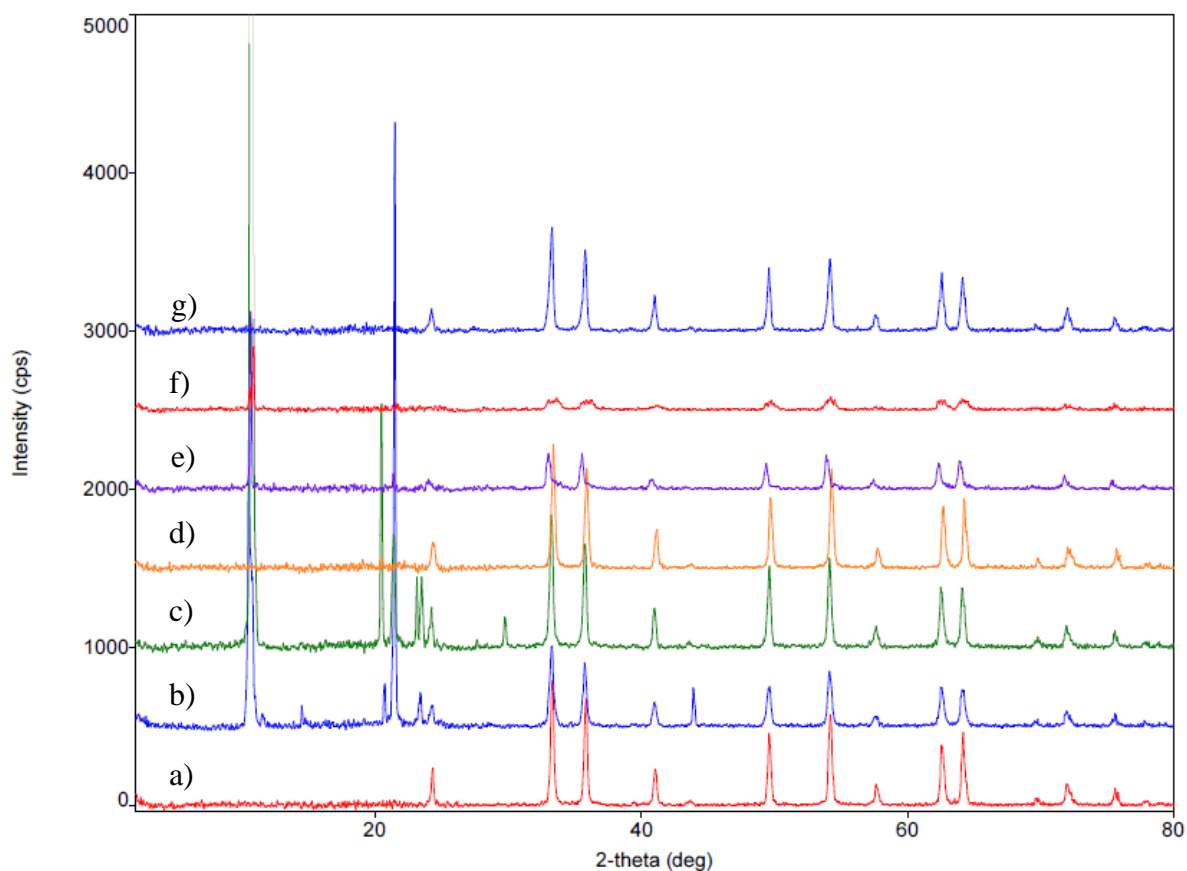

**Figure S2.** XRD patterns showing no bulk transformation of hematite under selected conditions: a) raw hematite, b) hematite treated at 150 °C for 30 min in air with 0.050 g pyrene and 50 uL of H<sub>2</sub>O, c) hematite treated at 150 °C for 30 min in N<sub>2</sub> with 0.050 g pyrene, d) hematite treated at 150 °C for 30 min in N<sub>2</sub> without pyrene, e) hematite treated at 250 °C for 30 min in air with 0.050 g pyrene and 50 uL of H<sub>2</sub>O, f) hematite treated at 250 °C for 30 min in N<sub>2</sub> with 0.050 g pyrene, g) hematite treated at 250 °C for 30 min in N<sub>2</sub> without pyrene



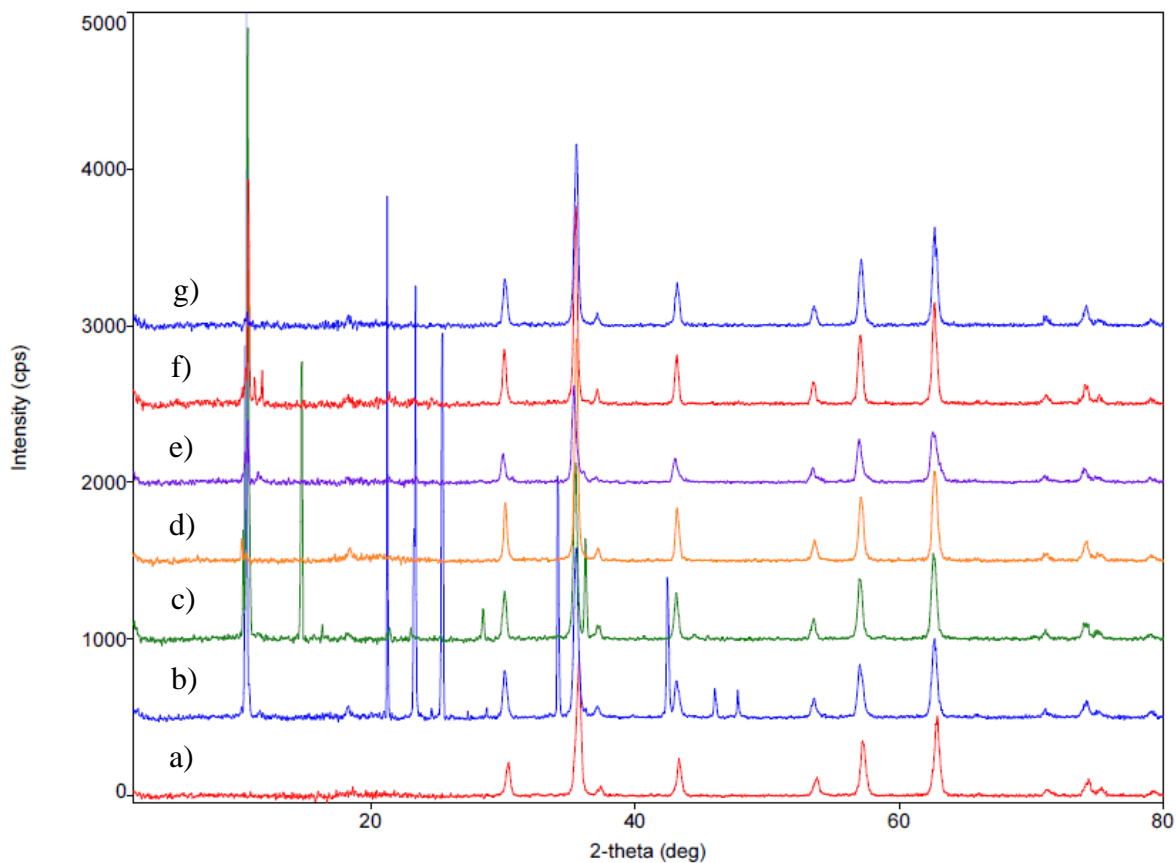

**Figure S3.** XRD patterns showing no bulk transformation of magnetite under various conditions: a) raw magnetite, b) magnetite treated at 150 °C for 30 min in air with 0.050 g pyrene and 50 uL of H<sub>2</sub>O, c) magnetite treated at 150 °C for 30 min in N<sub>2</sub> with 0.050 g pyrene, d) magnetite treated at 150 °C for 30 min in N<sub>2</sub> without pyrene, e) magnetite treated at 250 °C for 30 min in air with 0.050 g pyrene and 50 uL of H<sub>2</sub>O, f) magnetite treated at 250 °C for 30 min in N<sub>2</sub> with 0.050 g pyrene, g) magnetite treated at 250 °C for 30 min in N<sub>2</sub> without pyrene

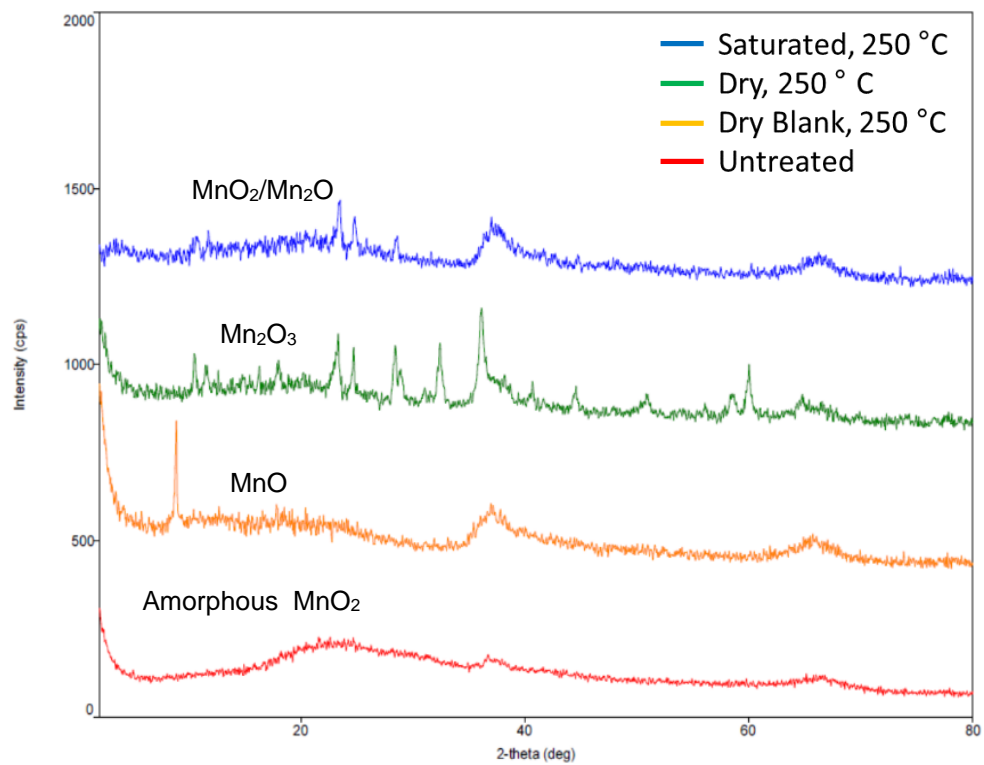

**Figure S4:** XRD patterns of birnessite after treatment under various conditions. Crystal phases detected shown next to diffraction patterns.

## 4.2. XPS Spectra

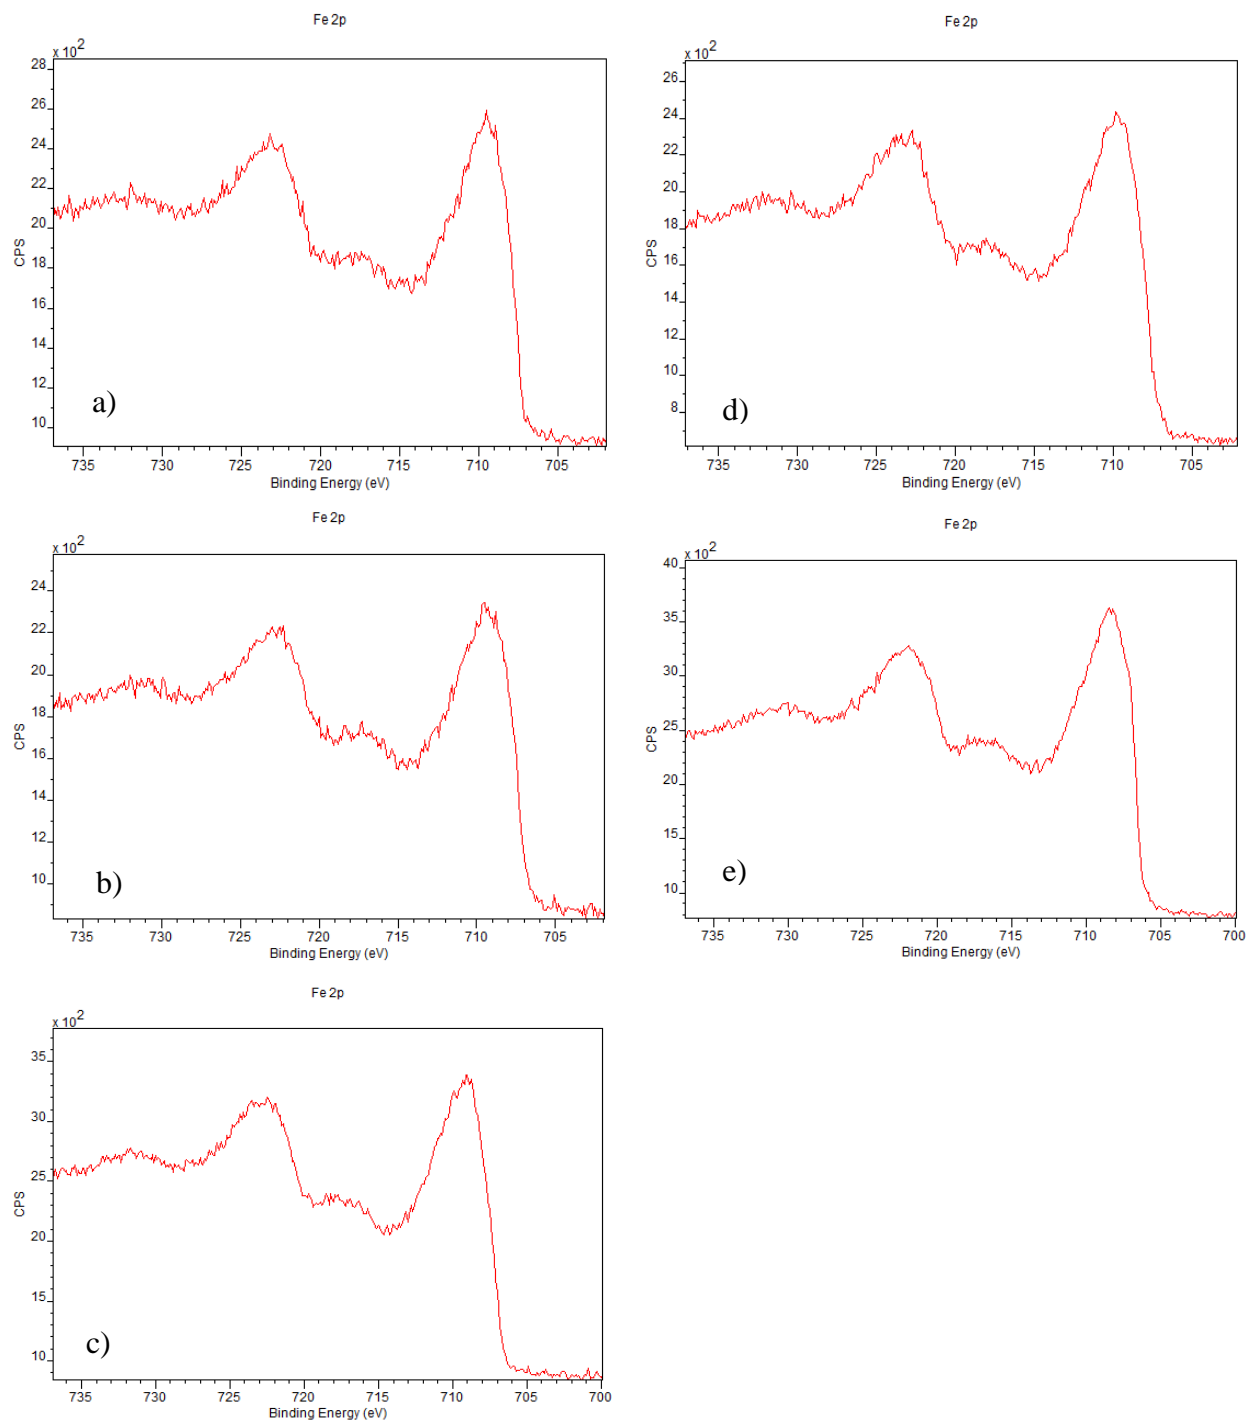

**Figure S5.** XPS Fe 2p spectra for a) untreated hematite, b) hematite treated at 250 °C for 30 min in N<sub>2</sub>, c) hematite treated at 250 °C for 30 min in air with 100 uL H<sub>2</sub>O, d) hematite treated at 250 °C for 30 min in N<sub>2</sub> with 0.050 g pyrene, e) hematite treated at 250 °C for 30 min in air with 0.050 g pyrene and 100 uL H<sub>2</sub>O,

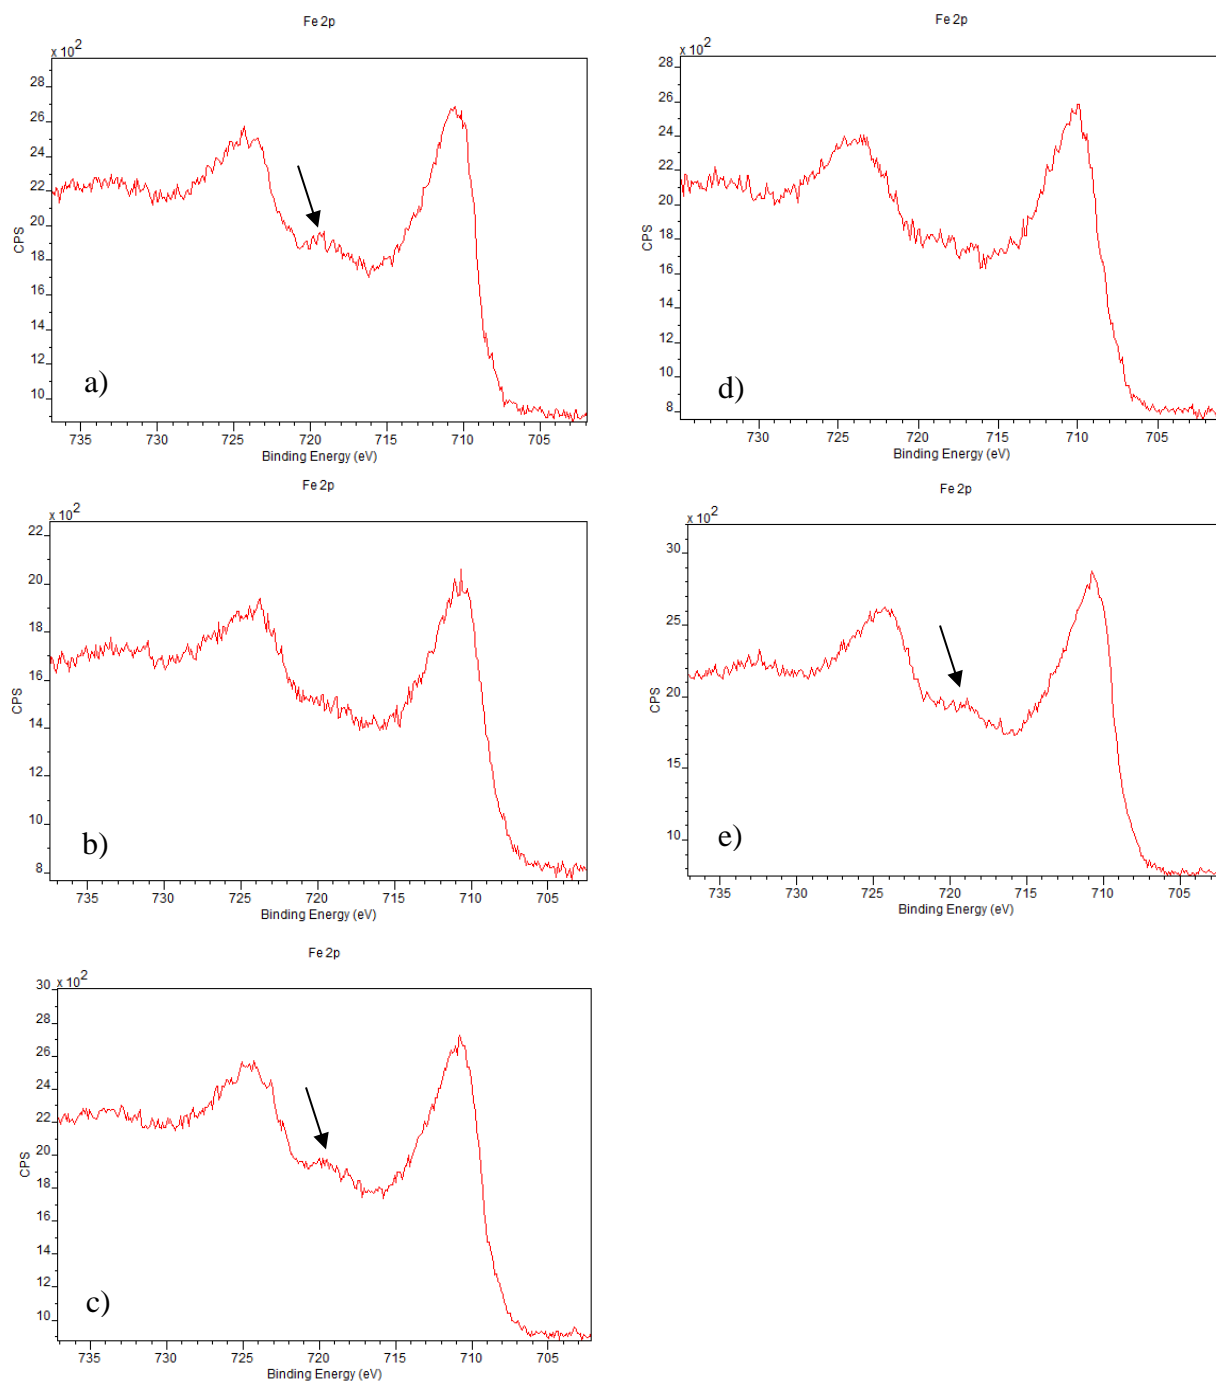

**Figure S6.** XPS Fe 2p spectra for a) untreated magnetite, b) magnetite treated at 250 °C for 30 min in N<sub>2</sub>, c) magnetite treated at 250 °C for 30 min in air with 100  $\mu$ L H<sub>2</sub>O, d) magnetite treated at 250 °C for 30 min in N<sub>2</sub> with 0.050 g pyrene, e) magnetite treated at 250 °C for 30 min in air with 0.050 g pyrene and 100  $\mu$ L H<sub>2</sub>O. Satellite peak indicating presence of hematite indicated by arrows.

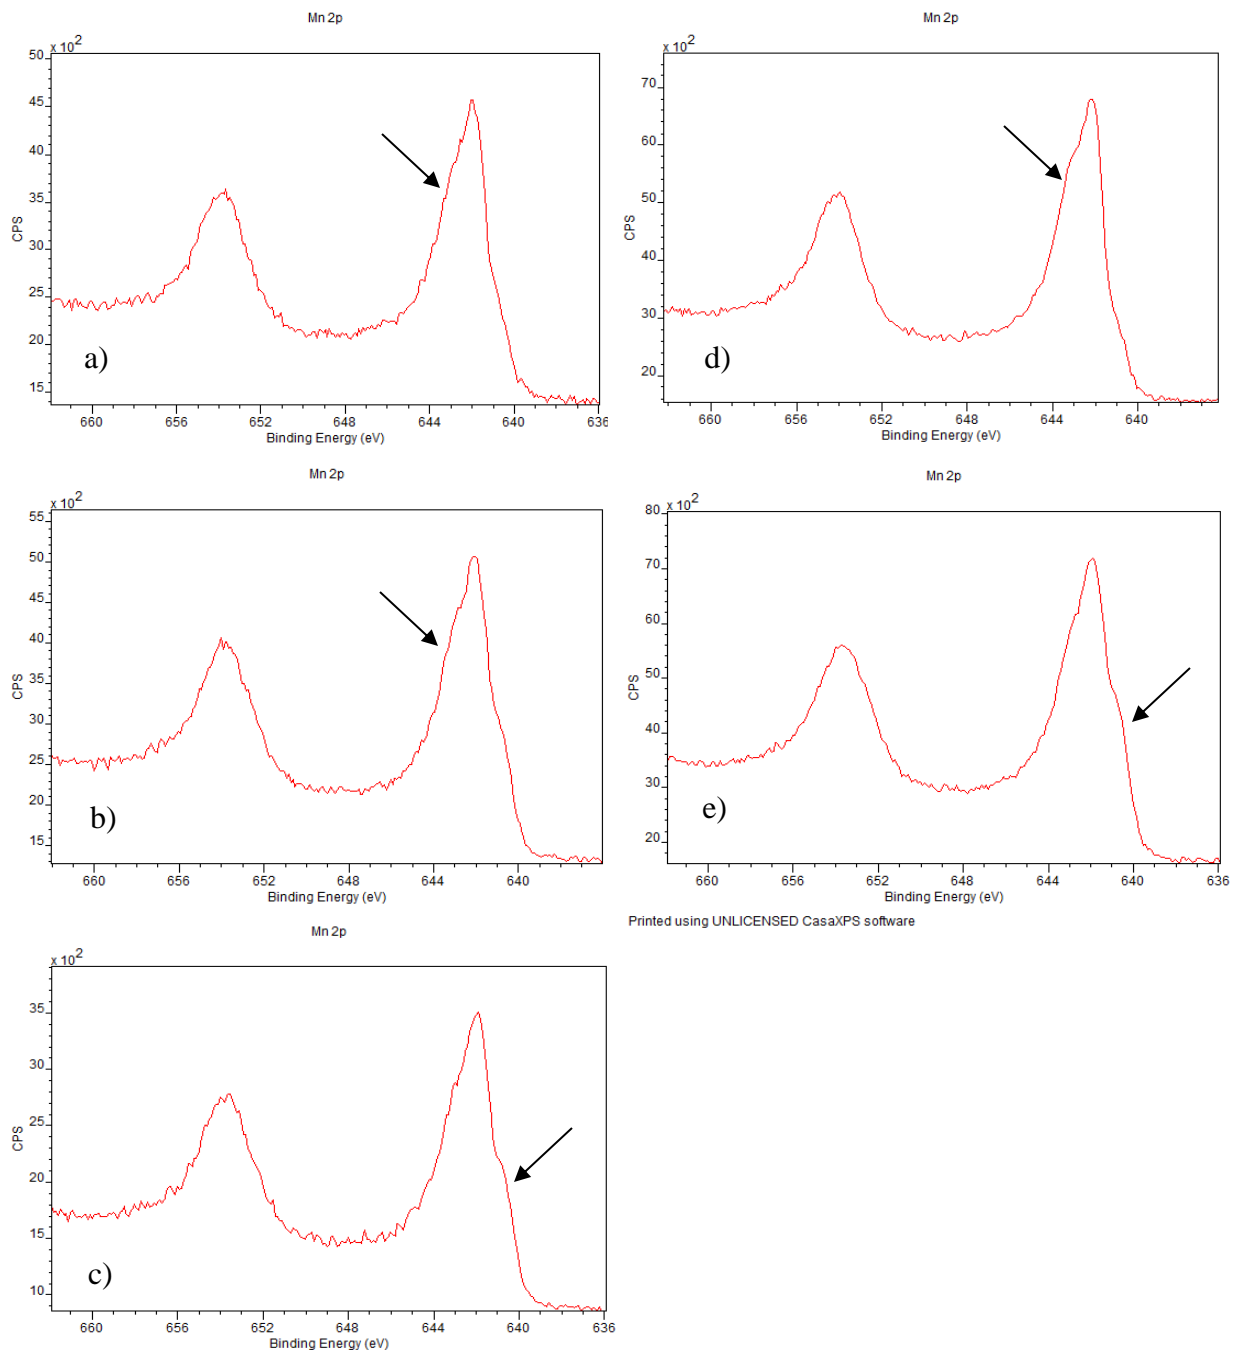

**Figure S7.** XPS Mn 2p spectra for a) untreated birnessite, b) birnessite treated at 250 °C for 30 min in N<sub>2</sub>, c) birnessite treated at 250 °C for 30 min in N<sub>2</sub> with 0.050 g pyrene, d) birnessite treated at 250 °C for 30 min in air with 100 uL H<sub>2</sub>O, e) birnessite treated at 250 °C for 30 min in air with 0.050 g pyrene and 100 uL H<sub>2</sub>O. Presence of shoulder indicated by arrows. Shoulder located on the left side of the peak indicates the presence of MnO<sub>2</sub>. Shoulder located on the right side of the peak indicates the presence of Mn<sub>2</sub>O<sub>3</sub>.

### 4.3. Electron transfer calculations

$$\begin{aligned}
 &C_{16}H_{10} + 6H^+ + 6e^- \rightarrow 8C_2H_2 \\
 &2(Fe_2^{3+}Fe^{2+})O_4 + H_2O \rightarrow 3Fe_2O_3 + 2H^+ + 2e^- \\
 &C_{16}H_{10} + 6(Fe_2^{3+}Fe^{2+})O_4 + 3H_2O \rightarrow 9Fe_2O_3 + 8C_2H_2 \\
 \text{Mass of } F_3O_4 &= (0.05 \text{ g pyrene}) \left( \frac{\text{mol pyrene}}{202 \text{ g pyrene}} \right) \left( \frac{6 \text{ mol } F_3O_4}{\text{mol pyrene}} \right) \left( \frac{231.6 \text{ g } F_3O_4}{\text{mol } F_3O_4} \right) = 0.34 \text{ g } F_3O_4
 \end{aligned}$$

$$\begin{aligned}
 &2MnO_2 + H_2O \rightarrow Mn_2O_3 + 2H^+ + 2e^- \\
 &C_{16}H_{10} + 6MnO_2 + 3H_2O \rightarrow 3Mn_2O_3 + 8C_2H_2 \\
 \text{Mass of } MnO_2 &= (0.05 \text{ g pyrene}) \left( \frac{\text{mol pyrene}}{202 \text{ g pyrene}} \right) \left( \frac{6 \text{ mol } MnO_2}{\text{mol pyrene}} \right) \left( \frac{86.9 \text{ g } MnO_2}{\text{mol } MnO_2} \right) = 0.12 \text{ g } MnO_2
 \end{aligned}$$

**Table S6.** Fe(III):Fe(II) ratios of magnetite samples treated under various conditions calculated from XPS Fe 2p peaks.

| Sample                                                                   | Fe(III):Fe(II) | Std Dev |
|--------------------------------------------------------------------------|----------------|---------|
| Untreated                                                                | 7.3            | 1.69    |
| 250 °C for 30 min in N <sub>2</sub>                                      | 5.4            | 1.9     |
| 250 °C for 30 min in N <sub>2</sub> with 0.050 g pyrene                  | 7.2            | 7.3     |
| 250 °C for 30 min in air with 100 uL H <sub>2</sub> O                    | 4.9            | 2.6     |
| 250 °C for 30 min in air with 0.050 g pyrene and 100 uL H <sub>2</sub> O | 5.0            | 1.9     |

## 5. Mössbauer

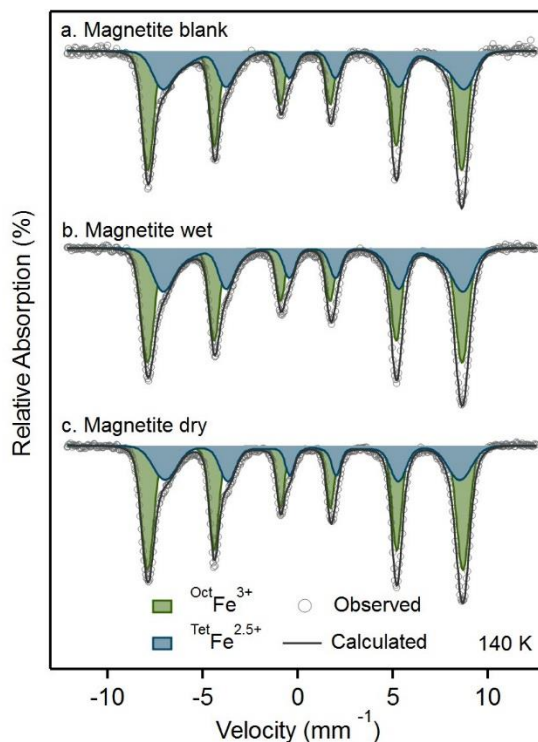

**Figure S8.** Mössbauer spectra of magnetite blank, magnetite wet and magnetite dry.

**Table S7.** Mössbauer parameters of magnetite samples derived from fitting spectra collected at 140 K.

|                 |                    | CS <sup>a</sup><br>(mm/s) | QS <sup>b</sup><br>(mm/s) | H <sup>c</sup><br>(T) | Std(H)<br>(T) | Area<br>(%) |
|-----------------|--------------------|---------------------------|---------------------------|-----------------------|---------------|-------------|
| Magnetite blank | Fe <sup>3+</sup>   | 0.39                      | -0.021                    | 51.1                  | 1.17          | 57.5        |
|                 | Fe <sup>2.5+</sup> | 0.79                      | 0.043                     | 47.3                  | 4.30          | 42.5        |
| Magnetite wet   | Fe <sup>3+</sup>   | 0.39                      | -0.011                    | 51.2                  | 1.45          | 58.7        |
|                 | Fe <sup>2.5+</sup> | 0.79                      | 0.016                     | 47.3                  | 4.30          | 41.3        |
| Magnetite dry   | Fe <sup>3+</sup>   | 0.41                      | -0.006                    | 51.4                  | 1.49          | 64.2        |
|                 | Fe <sup>2.5+</sup> | 0.79                      | -0.016                    | 45.8                  | 8.10          | 35.8        |

<sup>a</sup> Center shift

<sup>b</sup> Quadrupole shift

<sup>c</sup> Hyperfine Field

<sup>d</sup> Standards deviation of the Voigt profile for the hyperfine field

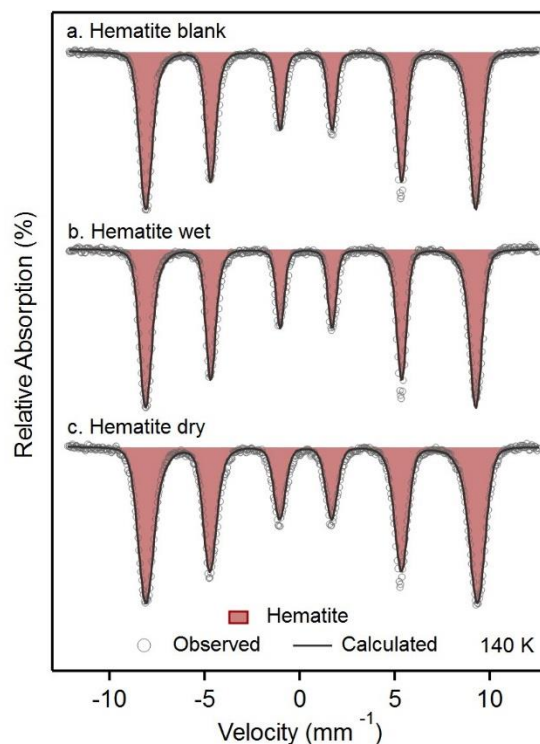

**Figure S9.** Mössbauer spectra of hematite blank, hematite wet and hematite dry.

**Table S8.** Mössbauer parameters of magnetite samples derived from fitting spectra collected at 140 K.

|                | CS <sup>a</sup><br>(mm/s) | QS <sup>b</sup><br>(mm/s) | H <sup>c</sup><br>(T) | Std(H)<br>(T) | Area<br>(%) |
|----------------|---------------------------|---------------------------|-----------------------|---------------|-------------|
| Hematite blank | 0.47                      | 0.122                     | 53.4                  | 1.95          | 100         |
| Hematite wet   | 0.46                      | 0.120                     | 53.5                  | 1.95          | 100.0       |
| Hematite dry   | 0.47                      | 0.159                     | 53.5                  | 2.51          | 100.0       |

<sup>a</sup> Center shift

<sup>b</sup> Quadrupole shift

<sup>c</sup> Hyperfine Field

<sup>d</sup> Standards deviation of the Voigt profile for the hyperfine field



## 6. By-Product Oxidation States

**Table S9:** Average oxidation state of carbons atoms in byproducts detected from concentrated extracts in mineral limited experiments with magnetite in a dry environment.

| <i>Temp</i><br>(°C) | <i>Compound</i>                         | <i>Formula</i> | <i>Avg C</i><br><i>Ox State</i> |
|---------------------|-----------------------------------------|----------------|---------------------------------|
| 500                 | Octane, 4,5-diethyl-                    | C12H26         | -2.17                           |
| 500                 | Decane, 5,6-dimethyl-                   | C12H26         | -2.17                           |
| 500                 | Undecane, 5-methyl-                     | C12H26         | -2.17                           |
| 500                 | Cyclohexane, 3-ethyl-5-methyl-1-propyl- | C12H24         | -2.00                           |
| 500                 | Cyclohexane, (1,2-dimethylbutyl)-       | C12H24         | -2.00                           |
| 500                 | Cyclohexane, undecyl-                   | C17H34         | -2.00                           |
| 500                 | Cyclohexane, octyl-                     | C14H28         | -2.00                           |
| 500                 | Naphthalene                             | C10H8          | -0.80                           |
| 300                 | Anthracene, 9-ethenyl-                  | C16H12         | -0.75                           |
| 100                 | Acephenanthrylene, 4,5-dihydro-         | C16H12         | -0.75                           |
| 500                 | Phenanthrene                            | C14H10         | -0.71                           |
| 500                 | Pyrene, 1-methyl-                       | C17H12         | -0.71                           |
| 100                 | 7H-Benzo[c]fluorene                     | C17H12         | -0.71                           |
| 100                 | 11H-Benzo[b]fluorene                    | C17H12         | -0.71                           |
| 100                 | 11H-Benzo[a]fluorene                    | C17H12         | -0.71                           |
| 100                 | 4H-Cyclopenta[def]phenanthrene          | C15H10         | -0.67                           |
| 500                 | Pyrene, 1-phenyl-                       | C22H14         | -0.64                           |
| 300                 | Fluoranthene                            | C16H10         | -0.63                           |
|                     | Pyrene                                  | C16H10         | -0.63                           |
| 500                 | Perylene                                | C20H12         | -0.60                           |
| 500                 | Benzo[ghi]perylene                      | C22H12         | -0.55                           |
| 500                 | Indeno[1,2,3-cd]pyrene                  | C22H12         | -0.55                           |

**Table S10:** Average oxidation state of carbons atoms in byproducts detected from concentrated extracts in mineral limited experiments with magnetite in a saturated environment.

| <i>Temp (°C)</i> | <i>Compound</i>                         | <i>Formula</i> | <i>Avg C Ox State</i> |
|------------------|-----------------------------------------|----------------|-----------------------|
| 300              | Heptane, 3,4,5-trimethyl-               | C10H22         | -2.20                 |
| 500              | Decane, 5,6-dimethyl-                   | C12H26         | -2.17                 |
| 500              | Undecane, 5-methyl-                     | C12H26         | -2.17                 |
| 300              | Octane, 4,5-diethyl-                    | C12H26         | -2.17                 |
| 500              | Cyclohexane, octyl-                     | C14H28         | -2.15                 |
| 300              | Undecane, 4,4-dimethyl-                 | C13H28         | -2.15                 |
| 500              | Cyclohexane, 3-ethyl-5-methyl-1-propyl- | C12H24         | -2.00                 |
| 300              | Cyclohexane, (1,2-dimethylbutyl)-       | C12H24         | -2.00                 |
| 300              | Cyclohexane, (1-methylethyl)-           | C14H28         | -2.00                 |
| 300              | Isobutyl stearate                       | C22H44O2       | -1.82                 |
| 500              | 3-n-Propyl-5-methylhexan-2-one          | C10H20O        | -1.80                 |
| 500              | Cyclohexaneethanol                      | C8H16O         | -1.75                 |
| 500              | 3-Hexanone                              | C6H12O         | -1.67                 |
| 500              | 5,8-Tridecadione                        | C13H24O2       | -1.54                 |
| 300              | 3-n-Propyl-2,4-pentanedione             | C8H14O2        | -1.25                 |
| 500              | Biphenyl                                | C12H10         | -0.83                 |
| 300              | Pyrene, 1,3-dimethyl-                   | C18H14         | -0.78                 |
| 500              | 1H-Indene, 1-(phenylmethylene)-         | C16H12         | -0.75                 |
| 100              | Anthracene, 9-ethenyl-                  | C16H12         | -0.75                 |
| 500              | Phenanthrene                            | C14H10         | -0.71                 |
| 500              | Pyrene, 1-methyl-                       | C17H12         | -0.71                 |
| 100              | 11H-Benzo[a]fluorene                    | C17H12         | -0.71                 |
| 100              | 7H-Benzanthrene                         | C17H12         | -0.71                 |
| 500              | Cyclopenta(cd)pyrene, 3,4-dihydro-      | C18H12         | -0.67                 |
| 100              | Cyclopenta[def]phenanthrene             | C15H10         | -0.67                 |
| 500              | Pyrene, 1-phenyl-                       | C22H14         | -0.64                 |
| 500              | Pentacene                               | C22H14         | -0.64                 |
| 500              | 5-Methoxy-benzo[c]phenanthrene          | C19H14O        | -0.63                 |
|                  | Pyrene                                  | C16H10         | -0.63                 |
| 500              | Benzophenone                            | C13H10O        | -0.62                 |
| 500              | Benzo[e]pyrene                          | C20H12         | -0.60                 |
| 500              | Indeno[1,2,3-cd]pyrene                  | C22H12         | -0.55                 |
| 500              | Naphtho[2,1-b]furan                     | C12H8O         | -0.50                 |
| 500              | Dibenzofuran                            | C12H8O         | -0.50                 |
| 300              | 1-Hydroxypyrene                         | C16H10O        | -0.50                 |
| 500              | 1H-Phenalen-1-one                       | C13H8O         | -0.46                 |
| 500              | Naphtho[2,1,8,7-klmn]xanthene           | C18H10O        | -0.44                 |
| 500              | Cyclopenta(def)phenanthrenone           | C15H8O         | -0.40                 |
